# Supplementary material for: Highly efficient19F heteronuclear decoupling in solid-state NMR spectroscopy using supercycled refocused-CW irradiation
Source: Royal Society of Chemistry journal article supplement (doi:10.1039/c6cp06574k), 2016-01-01
Supplement: c6cp06574k1.pdf [file c6cp06574k1.pdf]

## Supporting Information

### Highly efficient $^{19}\text{F}$ heteronuclear decoupling in solid-state NMR spectroscopy using supercycled refocused-CW irradiation

Asif Equbal<sup>a</sup>, Kristoffer Basse<sup>a</sup>, Niels Chr. Nielsen<sup>a</sup>

<sup>a</sup>Center for Insoluble Protein Structures(inSPIN), Interdisciplinary Nanoscience Center (iNANO)  
and Department of Chemistry, Aarhus University, Gustav Wieds Vej 14, DK-8000 Aarhus  
C, Denmark

#### Details on experiments

| All the experiments mentioned here were recorded on a Bruker Avance II widebore 400 MHz instrument. |                                                                                                                                                                                                                                                                                                                                                                                                                                                                                                                                                                                                                                                                             |                                                   |
|-----------------------------------------------------------------------------------------------------|-----------------------------------------------------------------------------------------------------------------------------------------------------------------------------------------------------------------------------------------------------------------------------------------------------------------------------------------------------------------------------------------------------------------------------------------------------------------------------------------------------------------------------------------------------------------------------------------------------------------------------------------------------------------------------|---------------------------------------------------|
| Figure2                                                                                             | Decoupling condition:<br>$r\text{CW}^{[0\text{p}]}:$ $\tau_A = \tau_r, v_1^{\text{CW}} = v_1^\pi = v_1$<br>$r\text{CW}^{[0\text{p}90\text{p}]}:$ $\tau_A = 1.01\tau_r, v_1^{\text{CW}} = v_1^\pi = v_1$<br>$r\text{CW}^{[0\text{p}180\text{p}0\text{m}180\text{m}]}:$ $\tau_A = 1.02\tau_r, v_1^{\text{CW}} = v_1^\pi = v_1$<br>$r\text{CW}^{[0\text{p}180\text{m}0\text{m}180\text{p}]}:$ $\tau_A = 0.98\tau_r, v_1^{\text{CW}} = v_1^\pi = v_1$<br>SPINAL64: $\tau = 4.00 \mu\text{s}$ (flip angle $180^\circ$ ), Phase: $\Theta = 10^\circ, \alpha = 5^\circ, \beta = 10^\circ$<br>TPPM: $\tau = 3.75 \mu\text{s}$ (flip angle $169^\circ$ ), Phase: $\Theta = 20^\circ$ | $v_1 = 125 \text{ kHz}$<br>$v_r = 25 \text{ kHz}$ |
| Figure3                                                                                             | Decoupling condition:<br>$r\text{CW}^{[0\text{p}90\text{p}]}:$ $\tau_A = 1.03\tau_r, v_1^{\text{CW}} = v_1^\pi = v_1$<br>SPINAL64: $\tau = 4.30 \mu\text{s}$ (flip angle $171^\circ$ ), Phase: $\Theta = 10^\circ, \alpha = 5^\circ, \beta = 10^\circ$<br>TPPM: $\tau = 3.75 \mu\text{s}$ (flip angle $149^\circ$ ), Phase: $\Theta = 25^\circ$                                                                                                                                                                                                                                                                                                                             | $v_1 = 110 \text{ kHz}$<br>$v_r = 15 \text{ kHz}$ |

#### Fig.SI-1: Numerical simulations for a larger $^{19}\text{F}$ -CSA in a $^{13}\text{CF}_2$ spin system.

Here, we show the numerically simulated decoupling profile of (a)  $r\text{CW}^{[0\text{p}180\text{p}0\text{m}180\text{m}]}$  and (b)  $r\text{CW}^{[0\text{p}90\text{p}]}$  for a  $\text{CF}_2$  system (same parameters as in Fig.4a-b except an increased  $^{19}\text{F}$ -CSA of 100 ppm ( $\sim 40 \text{ kHz}$ )) as a function of  $\tau_A/\tau_r$  and  $v_1$  with  $v_r = 15 \text{ kHz}$ .

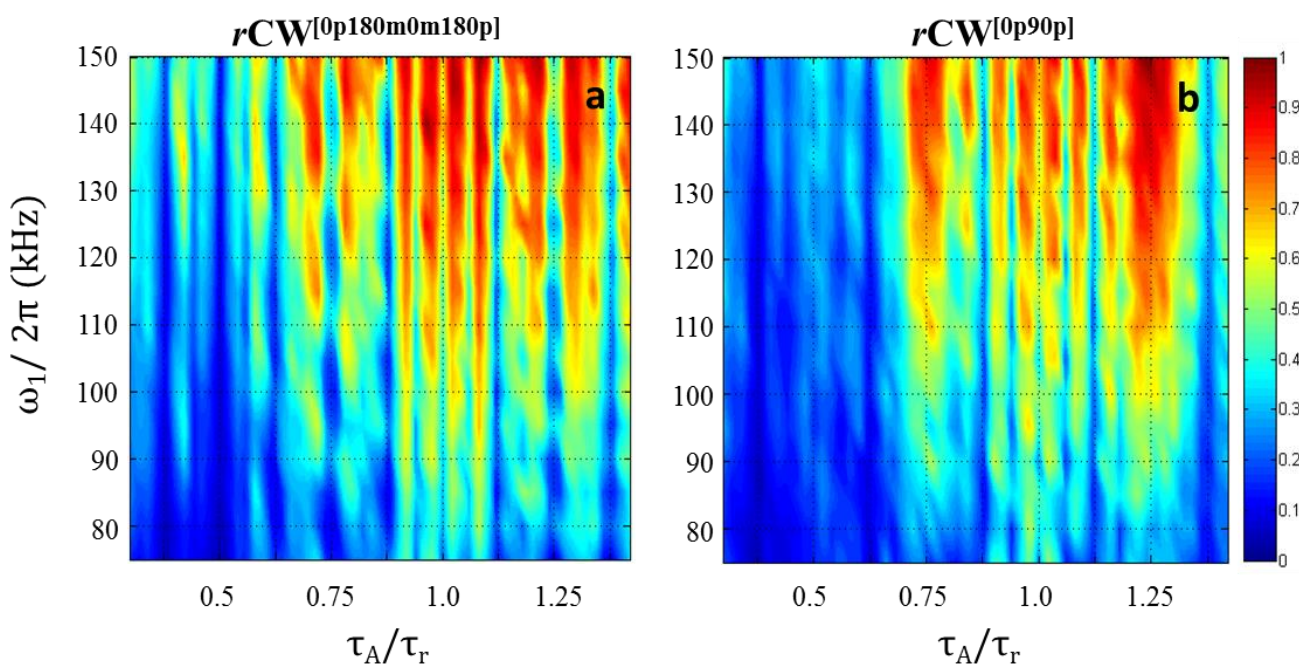

**Fig.SI-2: Numerical simulations for varying  $^{19}\text{F}$ -CSA and  $^{19}\text{F}$ - $^{19}\text{F}$  dipole coupling strength in a  $\text{CF}_2$  spin system.**

Numerically simulated normalized peak height observed for the  $^{13}\text{C}$  resonance of a  $\text{CF}_2$  spin system as a function of  $^{19}\text{F}$ -CSA and  $^{19}\text{F}$ - $^{19}\text{F}$  dipole coupling strength under (a)  $r\text{CW}^{[0p180m0m180p]}$ , (b) TPPM, and (c) XiX irradiation with  $\nu_1 = 125$  kHz,  $\nu_r = 15$  kHz, and a magnetic field strength of 400 MHz. While TPPM is not tolerant towards high CSA, XiX performance is hindered by homonuclear interaction.

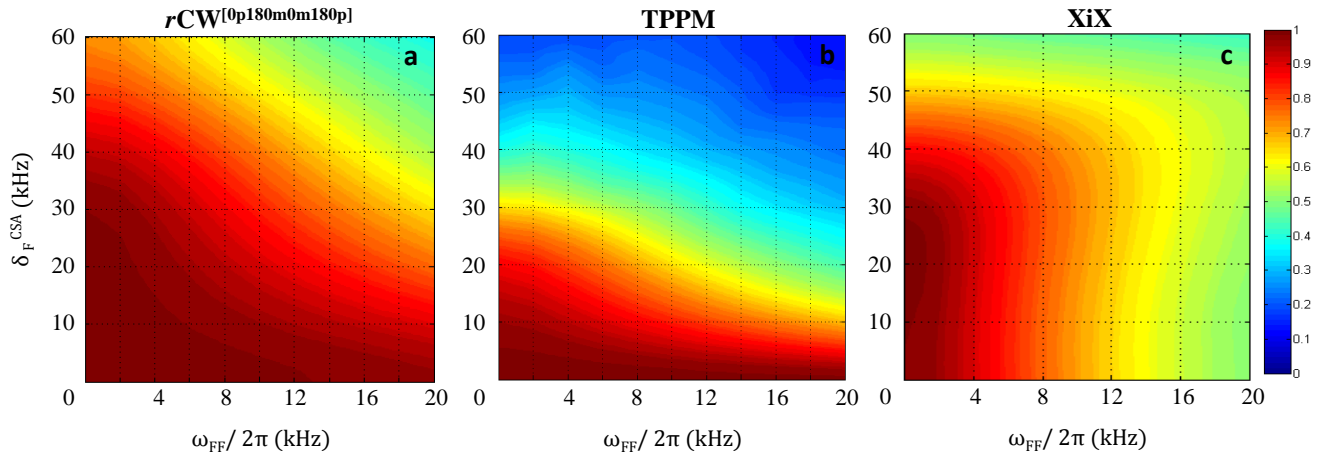

**Floquet analysis**

The form of the effective dipolar Hamiltonian induced by the cross term between the  $II$  homonuclear dipolar coupling and the  $IS$  heteronuclear dipolar coupling is given by

$$H_{(II-IS)}^{(0,0)} = - \sum_{\mu, \nu, \sigma, \gamma \equiv x, y, z} \sum_{i, j} \sum_{n, k} \frac{a_k^{\mu\nu} a_{-k}^{\sigma} \omega_{I_i I_j}^{(n)} \omega_{I_i S}^{(-n)}}{n\omega_r + k\omega_c} I_{i\gamma} I_{j\nu} S_z$$

Here, the indices  $i$  and  $j$  represent different spins of  $I$  and the indices  $\mu$ ,  $\sigma$ , and  $\gamma$  follow the Levi-Civita permutation relations.
